# Supplementary material
Source: PubMed Central journal article supplement (PMC10589067)
Supplement: NIHMS1936072-supplement-1.pdf [file NIHMS1936072-supplement-1.pdf]

## **SUPPLEMENTARY TABLES**

**Supplementary Table 1: Differences in body composition parameters between the inflammatory bowel disease and healthy control populations**

| <b>Body composition parameters</b>               | <b>Cohort with Inflammatory Bowel Disease (n = 141)</b> | <b>Healthy controls (n = 51)</b> | <b>p-value</b> |
|--------------------------------------------------|---------------------------------------------------------|----------------------------------|----------------|
| Female Gender [n (%)]                            | 76 (56.6)                                               | 28 (54.9)                        | 0.86           |
| Age [Mean in years (SD)]                         | 40 (17)                                                 | 40 (17)                          | 0.74           |
| Total Mass [Mean in Kg (SD)]                     | 81.6 (21)                                               | 84.5 (22.7)                      | 0.32           |
| Body Mass Index [Mean in Kg/m <sup>2</sup> (SD)] | 28.3 (6.9)                                              | 29.0 (7.1)                       | 0.37           |
| Percentage of body fat (Mean % (SD))             | 35.0 (10.5)                                             | 35.3 (10.3)                      | 0.86           |
| Total Adipose Mass [Mean in Kg (SD)]             | 29.6 (14.4)                                             | 30.8 (15.8)                      | 0.65           |
| Total IA-VAT <sup>1</sup> Mass [Mean in Kg (SD)] | 938 (336-1742)                                          | 807 (353-1553)                   | 0.58           |
| IA-VAT <sup>1</sup> % [Mean in % (SD)]           | 1.32 (0.98)                                             | 1.20 (0.14-0.89)                 | 0.44           |
| Total Lean Mass [mean in Kg (SD)]                | 48.3 (11)                                               | 50.1 (11.3)                      | 0.33           |

(1) IA-VAT: Intra-abdominal Visceral Adipose Tissue

**Supplementary Table 2: Differences in body composition parameters between the patients with a diagnosis of Crohn's disease vs. ulcerative colitis**

| <b>Body composition parameters</b>               | <b>Crohn's disease (n = 79)</b> | <b>Ulcerative Colitis (n = 62)</b> | <b>p-value</b> |
|--------------------------------------------------|---------------------------------|------------------------------------|----------------|
| Total Mass [Mean in Kg (SD)]                     | 82.15 (22.37)                   | 80.93 (18.92)                      | 0.73           |
| Body Mass Index [Mean in Kg/m <sup>2</sup> (SD)] | 28.74 (7.57)                    | 27.70 (5.84)                       | 0.37           |
| Percentage of Body Fat [Mean in % (SD)]          | 35.80 (10.4)                    | 34.00 (10.6)                       | 0.31           |
| Total IA-VAT <sup>1</sup> Mass [Mean in Kg (SD)] | 1.24 (1.09)                     | 1.15 (1.05)                        | 0.61           |
| Total Fat Mass [Mean in % (SD)]                  | 10.86 (5.7)                     | 10.02 (5.3)                        | 0.53           |
| IA-VAT <sup>1</sup> % [Mean in % (SD)]           | 1.36 (0.98)                     | 1.27 (0.99)                        | 0.61           |
| Total Lean Mass [Mean in Kg (SD)]                | 48.03 (10.4)                    | 49.11 (11.5)                       | 0.56           |

(1) IA-VAT: Intra-abdominal Visceral Adipose Tissue

**Supplementary Table 3: Differences in body composition parameters based on baseline steroid use.**

| Body composition parameters                      | On Steroids at Baseline (n=94) | Not on Steroids at Baseline (n=47) | p-value |
|--------------------------------------------------|--------------------------------|------------------------------------|---------|
| Total Mass [Mean in Kg (SD)]                     | 80.67 (20.14)                  | 83.50 (22.34)                      | 0.450   |
| Body Mass Index [Mean in Kg/m <sup>2</sup> (SD)] | 27.87 (5.89)                   | 29.12 (8.48)                       | 0.307   |
| Percentage of Body Fat [Mean in % (SD)]          | 35.33 (9.33)                   | 34.37 (12.55)                      | 0.609   |
| Total IA-VAT <sup>1</sup> Mass [Mean in Kg (SD)] | 1.18 (1.07)                    | 1.24 (1.07)                        | 0.752   |
| Total Fat Mass [Mean in % (SD)]                  | 29.12 (12.57)                  | 30.67 (17.62)                      | 0.550   |
| IA-VAT <sup>1</sup> % [Mean in % (SD)]           | 1.32 (1.0)                     | 1.31 (0.97)                        | 0.940   |
| Total Lean Mass [Mean in Kg (SD)]                | 48.8 (11.63)                   | 49.38 (9.21)                       | 0.502   |

(1) IA-VAT: Visceral Adipose Tissue Mass.

**Supplementary Table 4: Differences between those patients that did and did not achieve deep, steroid-free remission at week 30 (infliximab and vedolizumab) or week 32 (ustekinumab) of therapy.**

|                                                                             | SFDR <sup>1</sup> at Week 30/32 (n=51) | No SFDR <sup>1</sup> at Week 30/32 (n=77) | p-value |
|-----------------------------------------------------------------------------|----------------------------------------|-------------------------------------------|---------|
| Female gender [n (%)]                                                       | 28 (54.6)                              | 42 (54.6)                                 | 0.96    |
| Age [Mean (SD)]                                                             | 36.50 (15.85)                          | 42.8 (17.8)                               | 0.04*   |
| Hispanic Ethnicity [n (%)]                                                  | 3 (5.9)                                | 3 (3.9)                                   | 0.6     |
| Race [n (%)]                                                                |                                        |                                           | 0.26    |
| Caucasian                                                                   | 50 (98.0)                              | 70 (90.9)                                 |         |
| African-American                                                            | None                                   | 6 (7.8)                                   |         |
| Asian                                                                       | 1 (1.3)                                | 1 (1.3)                                   |         |
| Other                                                                       | None                                   | None                                      |         |
| Disease Type [n (%)]                                                        |                                        |                                           | 0.23    |
| Crohn's disease                                                             | 25 (49.02)                             | 46 (59.74)                                |         |
| Ulcerative colitis                                                          | 26 (51.0)                              | 31 (40.26)                                |         |
| Active Smoker [n (%)]                                                       | 4 (7.8)                                | 8 (10.4)                                  | 0.63    |
| Years with inflammatory bowel disease [Median in years (IQR <sup>1</sup> )] | 5 (1-13)                               | 6 (2-13)                                  | 0.4     |
| <b>Phenotype of Crohn's disease<sup>3</sup></b>                             |                                        |                                           |         |
| Location [n (%)]                                                            |                                        |                                           | 0.532   |
| L1: Ileal                                                                   | 3 (12.0)                               | 12 (26.1)                                 |         |
| L2: Colonic                                                                 | 5 (19.6)                               | 9 (20.0)                                  |         |
| L3: Ileocolonic                                                             | 17 (68.0)                              | 25 (54.4)                                 |         |
| L4: Upper Gastrointestinal tract involvement [n (%)]                        | 2 (8.0)                                | 4 (8.7)                                   | 1.00    |
| B1: Not stricturing, non-penetrating [n (%)]                                | 13 (52.0)                              | 19 (41.30)                                | 0.61    |
| B2: Stricturing [n (%)]                                                     | 7 (28)                                 | 21 (45.65)                                | 0.225   |
| B3: Penetrating [n (%)]                                                     | 5 (20.0)                               | 10 (21.74)                                | 1.00    |
| <b>Phenotype of Ulcerative Colitis<sup>4</sup></b>                          |                                        |                                           |         |
| Location [n (%)]                                                            |                                        |                                           | 0.545   |
| L1: Ileal                                                                   | 1 (4.00)                               | 0 (0)                                     |         |
| L2: Colonic                                                                 | 6 (24.00)                              | 9 (30.0)                                  |         |
| L3: Ileocolonic                                                             | 19 (73.1)                              | 21 (70.0)                                 |         |
| <b>Body Composition Parameters at Baseline</b>                              |                                        |                                           |         |
| Total Mass [Mean in Kg (SD)]                                                | 72.56 (16.3)                           | 86.63 (20.73)                             | <0.001* |
| Body Mass Index [Mean in Kg/m <sup>2</sup> (SD)]                            | 24.9 (4.26)                            | 30.14 (7.2)                               | <0.001* |
| Percentage of Body Fat [Mean in % (SD)]                                     | 30.06 (9.8)                            | 37.75 (10.01)                             | <0.001* |
| Total IA-VAT <sup>5</sup> Mass [Mean in Kg (SD)]                            | 0.64 (0.56)                            | 1.53 (1.16)                               | <0.001* |

|                                                                         |                  |                |           |
|-------------------------------------------------------------------------|------------------|----------------|-----------|
| Total Fat Mass [Mean in % (SD)]                                         | 22.3 (10.51)     | 33.63 (14.6)   | <0.001*   |
| IA-VAT <sup>5</sup> percentage of total body mass [Mean in % (SD)]      | 0.79 (0.57)      | 1.63 (1.1)     | <0.001*   |
| Total Lean Mass [Mean in Kg (SD)]                                       | 47.05 (10.8)     | 49.5 (10.8)    | 0.21      |
| <b>Medications at Baseline and Previous Exposure</b>                    |                  |                |           |
| Previous Use of Biologic [n (%)]                                        | 28 (52.08)       | 56 (72.7)      | 0.038*    |
| Biologic started [n (%)]                                                |                  |                | 0.15      |
|                                                                         | Infliximab       | 22 (43.1)      | 23 (29.9) |
|                                                                         | Ustekinumab      | 12 (23.5)      | 30 (39.0) |
|                                                                         | Vedolizumab      | 17 (33.3)      | 24 (31.2) |
| Receiving steroids at baseline [n (%)]                                  | 31 (60.8)        | 57 (74.03)     | 0.114     |
| Use 5-aminosalicylates [n (%)]                                          | 5 (9.8)          | 4 (5.2)        | 0.32      |
| Receiving combination therapy with immunomodulator [n (%)]              | 21 (41.18)       | 34 (44.16)     | 0.74      |
| Receiving a thiopurine for combination therapy [n (%)]                  | 19 (37.25)       | 24 (31.2)      | 0.48      |
| Receiving a methotrexate for combination therapy [n (%)]                | 5 (9.8)          | 10 (13.00)     | 0.58      |
| <b>Baseline Disease Activity</b>                                        |                  |                |           |
| Simple Endoscopic Score-CD <sup>3</sup> [Median (IQR)]                  | 12 (8-17)        | 9 (8-15)       | 0.45      |
| Harvey Bradshaw Index <sup>3</sup> [Median (IQR)]                       | 5 (2-7)          | 5 (3-8)        | 0.3       |
| Partial Mayo Score <sup>4</sup> [Median (IQR)]                          | 5 (4-7)          | 5 (4-6)        | 0.62      |
| Endoscopic Mayo Score <sup>4</sup> [n (%)]                              |                  |                | 0.49      |
|                                                                         | 2                | 13 (52)        | 19 (61.3) |
|                                                                         | 3                | 12 (48)        | 12 (48.0) |
| Baseline C-Reactive Protein [median in mg/dL (IQR)]                     | 0.3 (0.1-0.8)    | 0.7 (0.3-1.3)  | 0.003*    |
| Baseline Albumin [Mean in mg/dL (SD)]                                   | 4.2 (0.44)       | 4.11 (0.48)    | 0.16      |
| Baseline Fecal Calprotectin <sup>6</sup> [Median in µg/mg(IQR)]         | 565 (207-1116)   | 951 (360-2500) | 0.07      |
| Was dose escalated through week 30/32 [n (%)]                           | 6 (12.5)         | 13 (17.1)      | 0.49      |
| Drug level week 30/32 in the highest two quartiles <sup>7</sup> [n (%)] | 33 (70.2)        | 22 (34.9)      | <0.001*   |
| <b>Infliximab pharmacokinetics<sup>8</sup></b>                          |                  |                |           |
| Infliximab drug levels week 30 [median in mg/dL (IQR)]                  | 17.2 (14.1-20.1) | 12 (4.7-17.4)  | 0.049*    |
| Detectable anti-infliximab antibodies [n (%)]                           | 1 (5.3)          | 2 (10.5)       | 0.55      |
| <b>Vedolizumab pharmacokinetics<sup>8</sup></b>                         |                  |                |           |
| Vedolizumab drug levels week 30 [median in mg/dL (IQR)]                 | 14 (7.1-16.2)    | 8.4 (3.5-32.9) | 0.13      |
| Detectable anti-vedolizumab antibodies [n (%)]                          | None             | None           | N/A       |
| <b>Ustekinumab pharmacokinetics<sup>8</sup></b>                         |                  |                |           |
| Ustekinumab drug levels week 32 [median in mg/dL (IQR)]                 | 7.6 (5.7-11.9)   | 4.7 (2-6.3)    | 0.013*    |
| Detectable anti-ustekinumab antibodies [n (%)]                          | None             | None           | N/A       |

(1) Steroid-free deep remission

(2) Interquartile range

(3) Applies to patients with Crohn's disease

(4) Applies to patients with ulcerative colitis

(5) IA-VAT: Intra-abdominal Visceral Adipose Tissue.

(6) 70 patients in the cohort had baseline fecal calprotectin performed

(7) Stratified by each biologic

(8) As applicable based on the drug the patient was on

(\*) Statistically significant

**Supplementary Table 5: Differences in characteristics among patients that started infliximab and did and did not achieve steroid free deep remission at week 14.**

| <b>Characteristics of patients receiving starting infliximab</b>   | <b>Achieved SFDR<sup>1</sup><br/>at week 14<br/>(n = 17)</b> | <b>Did not achieve<br/>SFDR<sup>1</sup> at week 14<br/>(n = 35)</b> | <b>p-value</b> |
|--------------------------------------------------------------------|--------------------------------------------------------------|---------------------------------------------------------------------|----------------|
| Female gender [n (%)]                                              | 10 (58.82)                                                   | 23 (65.71)                                                          | 0.628          |
| Age [mean in years (SD)]                                           | 33.12 (11.2)                                                 | 41.40 (18.4)                                                        | 0.095          |
| Hispanic ethnicity [n (%)]                                         | None                                                         | 3 (8.6)                                                             | 0.21           |
| Race [n (%)]                                                       |                                                              |                                                                     | 0.44           |
| Caucasian                                                          | 15 (88.2)                                                    | 33 (94.3)                                                           |                |
| African-American                                                   | 2 (11.76)                                                    | 2 (5.7)                                                             |                |
| Asian                                                              | None                                                         | None                                                                |                |
| Other                                                              | None                                                         | None                                                                |                |
| Disease Type [n (%)]                                               |                                                              |                                                                     | 0.457          |
| Crohn's disease                                                    | 12 (70.6)                                                    | 21 (60.0)                                                           |                |
| Ulcerative colitis                                                 | 5 (29.4)                                                     | 14 (40.0)                                                           |                |
| Active smoker at baseline [n (%)]                                  | 5 (29.4)                                                     | 2 (5.7)                                                             | 0.002*         |
| Years with IBD [Median in years (IQR <sup>2</sup> )]               | 4 (1-13)                                                     | 5 (1-10)                                                            | 0.99           |
| History of bowel resection [n (%)]                                 | 1 (5.9)                                                      | 1 (2.9)                                                             | 0.60           |
| <b>Phenotype of Crohn's disease<sup>3</sup></b>                    |                                                              |                                                                     |                |
| Location [n (%)]                                                   |                                                              |                                                                     | 0.531          |
| L1: Ileal                                                          | 2 (16.7)                                                     | 5 (23.8)                                                            |                |
| L2: Colonic                                                        | 1 (8.3)                                                      | 5 (23.8)                                                            |                |
| L3: Ileocolonic                                                    | 9 (75.0)                                                     | 11 (52.4)                                                           |                |
| L4: Upper Gastrointestinal tract involvement [n (%)]               | 1 (8.3)                                                      | 2 (9.5)                                                             | 1.00           |
| B1: Not stricturing, non-penetrating [n (%)]                       | 7 (58.3)                                                     | 12 (57.1)                                                           | 1.00           |
| B2: Stricturing [n (%)]                                            | None                                                         | 7 (33.3)                                                            | 0.032*         |
| B3: Penetrating [n (%)]                                            | 4 (33.3)                                                     | 3 (14.3)                                                            | 0.377          |
| <b>Phenotype of Ulcerative Colitis<sup>4</sup></b>                 |                                                              |                                                                     |                |
| Ulcerative Colitis Extension [n (%)]                               |                                                              |                                                                     | 0.013*         |
| Proctitis                                                          | None                                                         | None                                                                |                |
| Left-sided Colitis                                                 | None                                                         | 9 (64.3)                                                            |                |
| Pan-colitis                                                        | 5 (100)                                                      | 5 (35.7)                                                            |                |
| <b>Body Composition Parameters at Baseline</b>                     |                                                              |                                                                     |                |
| Total Mass [Mean in Kg (SD)]                                       | 69.0 (16.0)                                                  | 86.47 (23.2)                                                        | 0.007*         |
| Body Mass Index [Mean in Kg/m <sup>2</sup> (SD)]                   | 24.5 (4.8)                                                   | 30.1 (7.7)                                                          | 0.009*         |
| Percentage of Body Fat [Mean in % (SD)]                            | 27.8 (10.3)                                                  | 38.2 (10.2)                                                         | 0.001*         |
| Total IA-VAT <sup>5</sup> Mass [Mean in Kg (SD)]                   | 0.63 (0.51)                                                  | 1.40 (1.13)                                                         | 0.010*         |
| Total Fat Mass [Mean in % (SD)]                                    | 19.7 (10.6)                                                  | 34.3 (15.2)                                                         | <0.001*        |
| IA-VAT <sup>5</sup> percentage of total body mass [Mean in % (SD)] | 0.84 (0.54)                                                  | 1.46 (0.99)                                                         | 0.021*         |
| Total Lean Mass [Mean in Kg (SD)]                                  | 46.3 (10.7)                                                  | 48.6 (11.0)                                                         | 0.466          |
| <b>Medications at Baseline and Previous Exposure</b>               |                                                              |                                                                     |                |
| Previous Use of Biologic [n (%)]                                   | 6 (35.3)                                                     | 23 (65.7)                                                           | 0.038*         |
| Receiving steroids at baseline [n (%)]                             | 10 (58.8)                                                    | 25 (71.4)                                                           | 0.363          |
| Use 5-aminosalicylates [n (%)]                                     | 1 (5.88)                                                     | 4 (11.43%)                                                          | 1.00           |
| Receiving combination therapy with immunomodulator [n (%)]         | 8 (47.1)                                                     | 24 (68.6)                                                           | 0.135          |
| Receiving a thiopurine for combination therapy [n (%)]             | 7 (41.2)                                                     | 22 (62.9)                                                           | 0.140          |
| Receiving a methotrexate for combination therapy [n (%)]           | 2 (11.8)                                                     | 3 (8.6)                                                             | 1.00           |
| <b>Baseline Disease Activity</b>                                   |                                                              |                                                                     |                |

|                                                                        |                 |                 |        |
|------------------------------------------------------------------------|-----------------|-----------------|--------|
| Simple Endoscopic Score-CD <sup>3</sup> [Median (IQR <sup>2</sup> )]   | 16 (10-21)      | 8 (7-14)        | 0.026* |
| Harvey Bradshaw Index <sup>3</sup> [Median (IQR <sup>2</sup> )]        | 5 (2-7)         | 5 (4-11)        | 0.39   |
| Partial Mayo Score <sup>4</sup> [Median (IQR <sup>2</sup> )]           | 5 (3.3-6.8)     | 5 (3-8)         | 0.70   |
| Endoscopic Mayo Score <sup>4</sup> [n (%)]                             |                 |                 | 0.337  |
| 2                                                                      | 1 (20.0)        | 6 (42.9)        |        |
| 3                                                                      | 4 (80.0)        | 8 (57.1)        |        |
| Infliximab trough levels week 14 [median in mg/dL (IQR <sup>2</sup> )] | 11.4 (9.1-18.9) | 3.7 (0.5-13.0)  | 0.025* |
| C-Reactive Protein [median in mg/dL (IQR <sup>2</sup> )]               | 0.52 (0.3-2.2)  | 1 (0.3-2.0)     | 0.37   |
| Albumin [Mean in mg/dL (SD)]                                           | 4.13 (0.44)     | 4.11 (0.52)     | 0.921  |
| Fecal Calprotectin [Median in µg/mg (IQR <sup>2</sup> )]               | 766 (311-1250)  | 1155 (243-3649) | 0.68   |

(1) Steroid-free deep remission

(2) Interquartile range

(3) Applies to patients with Crohn's disease

(4) Applies to patients with ulcerative colitis

(5) IA-VAT: Intra-abdominal Visceral Adipose Tissue

(\*) Statistically significant

**Supplementary Table 6: Differences in characteristics among patients that started vedolizumab and did and did not achieve steroid free remission at week 14**

|                                                                    | <b>Achieved SFDR<sup>1</sup> at week 14 (n = 18)</b> | <b>Did not achieve SFDR<sup>1</sup> at week 14 (n = 28)</b> | <b>p-value</b> |
|--------------------------------------------------------------------|------------------------------------------------------|-------------------------------------------------------------|----------------|
| Female gender [n (%)]                                              | 8 (44.4)                                             | 14 (50.0)                                                   | 0.713          |
| Age [mean in years (SD)]                                           | 37.17 (13.5)                                         | 47.29 (18.8)                                                | 0.055          |
| Hispanic ethnicity [n (%)]                                         | 1 (5.6)                                              | 1 (3.6)                                                     | 0.74           |
| Race [n (%)]                                                       |                                                      |                                                             | 0.24           |
| Caucasian                                                          | 17 (94.4)                                            | 26 (92.9)                                                   |                |
| African-American                                                   | None                                                 | 2 (7.1)                                                     |                |
| Asian                                                              | 1 (5.6)                                              | None                                                        |                |
| Other                                                              | None                                                 | None                                                        |                |
| Active smoker at baseline [n (%)]                                  | None                                                 | 2 (7.14)                                                    | 0.513          |
| Years with inflammatory bowel disease [Median (IQR <sup>2</sup> )] | 5 (1-15)                                             | 5 (1-10)                                                    | 0.56           |
| Disease Type                                                       |                                                      |                                                             | 0.540          |
| Crohn's                                                            | 6 (33.3)                                             | 7 (25.0)                                                    |                |
| Ulcerative colitis                                                 | 12 (66.7)                                            | 21 (75.0)                                                   |                |
| History of bowel resection [n (%)]                                 | 1 (5.6)                                              | 2 (7.1)                                                     | 0.83           |
| <b>Phenotype of Crohn's disease<sup>3</sup></b>                    |                                                      |                                                             |                |
| Location [n (%)]                                                   |                                                      |                                                             | 1.00           |
| L1: Ileal                                                          | 1 (16.7)                                             | 2 (28.6)                                                    |                |
| L2: Colonic                                                        | 2 (33.3)                                             | 2 (28.6)                                                    |                |
| L3: Ileocolonic                                                    | 3 (50.0)                                             | 3 (42.9)                                                    |                |
| L4: Upper Gastrointestinal tract involvement [n (%)]               | None                                                 | None                                                        | NA             |
| B1: Not stricturing, non-penetrating [n (%)]                       | 4 (66.7)                                             | 4 (57.1)                                                    | 1.00           |
| B2: Stricturing [n (%)]                                            | 1 (16.7)                                             | 3 (42.9)                                                    | 0.559          |
| B3: Penetrating [n (%)]                                            | None                                                 | 1 (14.3)                                                    | 1.00           |
| <b>Phenotype of Ulcerative Colitis<sup>4</sup></b>                 |                                                      |                                                             |                |
| Ulcerative Colitis Extension [n (%)]                               |                                                      |                                                             | 0.171          |
| Proctitis                                                          | 1 (8.3)                                              | 1 (4.8)                                                     |                |
| Left-sided Colitis                                                 | 6 (50.0)                                             | 2 (9.5)                                                     |                |
| Pan-colitis                                                        | 5 (41.7)                                             | 18 (85.7)                                                   |                |
| <b>Body Composition Parameters at Baseline</b>                     |                                                      |                                                             |                |
| Total Mass [Mean in Kg (SD)]                                       | 80.22 (17.5)                                         | 85.80 (17.6)                                                | 0.299          |
| Body Mass Index [Mean in Kg/m <sup>2</sup> (SD)]                   | 26.16 (4.2)                                          | 29.79 (5.7)                                                 | 0.025*         |
| Percentage of Body Fat [Mean in % (SD)]                            | 31.21 (9.3)                                          | 38.20 (9.9)                                                 | 0.021*         |
| Total IA-VAT <sup>5</sup> Mass [Mean in Kg (SD)]                   | 0.77 (0.63)                                          | 1.56 (0.96)                                                 | 0.004*         |
| Total Fat Mass [Mean in % (SD)]                                    | 25.45 (10.7)                                         | 33.40 (12.7)                                                | 0.033*         |
| IA-VAT <sup>5</sup> percentage of total body mass [Mean in % (SD)] | 0.87 (0.6)                                           | 1.70 (0.9)                                                  | 0.001*         |
| IA-VAT <sup>5</sup> percentage of total fat mass [Mean in % (SD)]  | 2.83 (2.1)                                           | 4.34 (2.0)                                                  | 0.020*         |
| Total Lean Mass [Mean in Kg (SD)]                                  | 51.4 (11.9)                                          | 49.0 (10.7)                                                 | 0.476          |
| <b>Medications at Baseline and Previous Exposure</b>               |                                                      |                                                             |                |
| Previous Use of Biologic [n (%)]                                   | 3 (16.7)                                             | 15 (53.4)                                                   | 0.015*         |
| Receiving steroids at baseline [n (%)]                             | 10 (55.6)                                            | 17 (60.7)                                                   | 0.729          |
| Use 5-aminosalicylates [n (%)]                                     | 4 (22.2)                                             | 3 (10.7)                                                    | 0.407          |
| Receiving combination therapy with immunomodulator [n (%)]         | 4 (22.2)                                             | 7 (25.0)                                                    | 1.00           |
| Receiving a thiopurine for combination therapy [n (%)]             | 4 (22.22)                                            | 4 (14.29)                                                   | 0.69           |

|                                                                              |                  |                |           |
|------------------------------------------------------------------------------|------------------|----------------|-----------|
| Receiving a methotrexate for combination therapy [n (%)]                     | None             | 3 (10.71)      | 0.270     |
| Vedolizumab drug level at week 14 [Median in mg/dL (IQR)]                    | 14.3 (11.3-23.6) | 9.0 (5.6-14.0) | 0.01*     |
| Detectable anti-vedolizumab antibodies [n (%)]                               | None             | 1 (3.9)        | 0.30      |
| <b>Baseline Disease Activity</b>                                             |                  |                |           |
| Simple Endoscopic Score-CD <sup>1</sup> [Median (IQR)]                       | 6 (4-13)         | 10 (7-16)      | 0.25      |
| Harvey Bradshaw Index <sup>1</sup> [Median (IQR)]                            | 5 (2-10)         | 6 (4-8)        | 0.772     |
| Partial Mayo Score <sup>2</sup> [Median (IQR)]                               | 5 (2-6)          | 5 (4-7)        | 0.43      |
| Endoscopic Mayo Score <sup>2</sup> [n (%)]                                   |                  |                | 0.83      |
|                                                                              | 2                | 9 (75.0)       | 15 (71.4) |
|                                                                              | 3                | 3 (25.0)       | 6 (28.6)  |
| Vedolizumab trough drug levels week 14 [median in mg/dL (IQR <sup>2</sup> )] | 14.3 (11.3-23.6) | 9.0 (5.6-14.0) | 0.01*     |
| Detectable anti-vedolizumab antibodies [n (%)]                               |                  |                |           |
| C-Reactive Protein [median in mg/dL (IQR)]                                   | 0.1 (0.1-0.3)    | 0.7 (0.3-1.3)  | <0.001*   |
| Albumin [Mean in mg/dL (SD)]                                                 | 4.34 (0.39)      | 4.14 (0.47)    | 0.124     |
| Fecal Calprotectin <sup>4</sup> [Median in µg/mg(IQR)]                       | 495 (231-907)    | 662 (329-195)  | 0.44      |

(1) Steroid-free deep remission

(2) Interquartile range

(3) Applies to patients with Crohn's disease

(4) Applies to patients with ulcerative colitis

(5) IA-VAT: Intra-abdominal Visceral Adipose Tissue

(\*) Statistically significant

**Supplementary Table 7: Differences in characteristics among patients that started ustekinumab and did and did not achieve steroid free remission at week 16**

|                                                                    | <b>Achieved SFDR at week 16 (n = 13)</b> | <b>Did not achieve SFDR at week 16 (n = 30)</b> | <b>p-value</b> |
|--------------------------------------------------------------------|------------------------------------------|-------------------------------------------------|----------------|
| Female gender [n (%)]                                              | 10 (76.9)                                | 14 (46.7)                                       | 0.098          |
| Age [mean in years (SD)]                                           | 34.2 (12.7)                              | 40.57 (17.4)                                    | 0.244          |
| Hispanic ethnicity [n (%)]                                         | 1 (7.7)                                  | None                                            | 0.26           |
| Race [n (%)]                                                       |                                          |                                                 | 0.29           |
| Caucasian                                                          | 13 (100.0)                               | 25 (83.3)                                       |                |
| African-American                                                   | None                                     | 4 (13.3)                                        |                |
| Asian                                                              | None                                     | 1 (3.3)                                         |                |
| Other                                                              | None                                     | None                                            |                |
| Years with inflammatory bowel disease [Median (IQR)]               | 8 (1.3-15.3)                             | 11 (6-16)                                       | 0.26           |
| Disease Type [n (%)]                                               |                                          |                                                 | 0.99           |
| Crohn's disease                                                    | 10 (76.9)                                | 23 (76.7)                                       |                |
| Ulcerative colitis                                                 | 3 (23.1)                                 | 7 (23.3)                                        |                |
| Active smoker at baseline [n (%)]                                  | None                                     | 5 (16.7)                                        | 0.301          |
| Years with inflammatory bowel disease [Median in years (IQR)]      | 8 (1.3-15.3)                             | 11 (6-16)                                       | 0.26           |
| <b>Phenotype of Crohn's disease<sup>1</sup></b>                    |                                          |                                                 |                |
| Location [n (%)]                                                   |                                          |                                                 | 0.07           |
| L1: Ileal                                                          | 1 (10.0)                                 | 8 (34.78)                                       |                |
| L2: Colonic                                                        | 3 (30.0)                                 | 1 (4.35)                                        |                |
| L3: Ileocolonic                                                    | 6 (60.0)                                 | 14 (60.87)                                      |                |
| L4: Upper Gastrointestinal tract involvement [n (%)]               | 1 (10.0)                                 | 2 (8.7)                                         | 1.0            |
| B1: Not stricturing, non-penetrating [n (%)]                       | 3 (30.0)                                 | 4 (17.4)                                        | 0.646          |
| B2: Stricturing [n (%)]                                            | 6 (60.0)                                 | 13 (56.52)                                      | 1.00           |
| B3: Penetrating [n (%)]                                            | 1 (10.0)                                 | 8 (34.78)                                       | 0.22           |
| <b>Phenotype of Ulcerative Colitis<sup>2</sup></b>                 |                                          |                                                 |                |
| Ulcerative Colitis Extension [n (%)]                               |                                          |                                                 | 0.30           |
| Proctitis                                                          | None                                     | None                                            |                |
| Left-sided Colitis                                                 | 1 (33.3)                                 | None                                            |                |
| Pan-colitis                                                        | 2 (66.7)                                 | 7 (100)                                         |                |
| <b>Body Composition Parameters at Baseline</b>                     |                                          |                                                 |                |
| Total Mass [Mean in Kg (SD)]                                       | 66.55 (10.76)                            | 86.53 (23.38)                                   | 0.005*         |
| Body Mass Index [Mean in Kg/m <sup>2</sup> (SD)]                   | 33.79 (8.17)                             | 35.27 (10.89)                                   | 0.665          |
| Percentage of Body Fat [Mean in % (SD)]                            | 24.50 (3.31)                             | 29.79 (8.55)                                    | 0.037*         |
| Total IA-VAT <sup>3</sup> Mass [Mean in Kg (SD)]                   | 0.50 (0.30)                              | 1.52 (1.397)                                    | 0.013*         |
| Total Fat Mass [Mean in % (SD)]                                    | 22.73 (7.28)                             | 31.88 (17.22)                                   | 0.074          |
| IA-VAT <sup>3</sup> percentage of total body mass [Mean in % (SD)] | 0.73 (0.40)                              | 1.59 (1.30)                                     | 0.023*         |
| IA-VAT <sup>3</sup> percentage of total fat mass [Mean in % (SD)]  | 2.16 (1.09)                              | 4.51 (3.44)                                     | 0.021*         |
| Total Lean Mass [Mean in Kg (SD)]                                  | 41.08 (7.55)                             | 50.77 (10.72)                                   | 0.005*         |
| <b>Medications at Baseline and Previous Exposure</b>               |                                          |                                                 |                |
| Previous Use of Biologic [n (%)]                                   | 11 (84.62)                               | 29 (96.67)                                      | 0.213          |



|                                                             |                |                      |        |
|-------------------------------------------------------------|----------------|----------------------|--------|
| Receiving steroids at baseline [n (%)]                      | 7 (53.9)       | 25 (83.3)            | 0.042* |
| Use 5-aminosalicylates [n (%)]                              | 1 (7.7)        | 0 (0)                | 0.302  |
| Receiving combination therapy with immunomodulator [n (%)]  | 7 (53.9)       | 13 (43.3)            | 0.526  |
| Receiving a thiopurine for combination therapy [n (%)]      | 5 (38.5)       | 9 (30.0)             | 0.587  |
| Receiving a methotrexate for combination therapy [n (%)]    | 3 (23.1)       | 4 (13.3)             | 0.270  |
| Ustekinumab trough level at week 16 [Median in mg/dL (IQR)] | 7.8 (6.5-10.3) | 3.6 (2.3-5.2)        | 0.003* |
| Detectable anti-ustekinumab antibodies [n (%)]              | None           | None                 | N/A    |
| <b>Baseline Disease Activity</b>                            |                |                      |        |
| Simple Endoscopic Score-CD <sup>1</sup> [Median (IQR)]      | 9 (8-12)       | 8 (7-20)             | 0.65   |
| Harvey Bradshaw Index <sup>1</sup> [Median (IQR)]           | 5 (1-5)        | 5 (2-8)              | 0.25   |
| Partial Mayo Score <sup>2</sup> [Median (IQR)]              | 6 (5-8)        | 4 (2-5)              | 0.035* |
| Endoscopic Mayo Score <sup>2</sup> [n (%)]                  |                |                      | 0.04*  |
|                                                             | 2<br>3         | 5 (71.4)<br>3 (28.6) |        |
| C-Reactive Protein [median in mg/dL (IQR)]                  | 0.3 (0.1-0.61) | 0.65 (0.3-1.3)       | 0.027* |
| Albumin [Mean in mg/dL (SD)]                                | 4.39 (0.28)    | 4.08 (0.51)          | 0.051  |
| Fecal Calprotectin <sup>4</sup> [Median in µg/mg(IQR)]      | 427 (54-988)   | 648 (214-2441)       | 0.19   |

(1) Patients with Crohn's disease

(2) Patients with ulcerative colitis

(3) IA-VAT: Intra-abdominal Visceral Adipose Tissue

(4) 7 patients in the cohort had baseline fecal calprotectin performed at week 16

(\*) Statistically significant

**Supplementary Table 8: Differences in interleukin levels between patients with active inflammatory bowel disease and a healthy control group.**

| <b>Cytokine</b>                                     | <b>Healthy Control Group (n=50)</b> | <b>Inflammatory Bowel Disease Patients (n=45)</b> | <b>P value</b> |
|-----------------------------------------------------|-------------------------------------|---------------------------------------------------|----------------|
| Interferon Gamma [Median in pg/ml (IQR)]            | 0.087 (0.06-0.11)                   | 0.1 (0.053-0.19)                                  | 0.17           |
| Interleukin-1a [Median in pg/ml (IQR)]              | 0.26 (0.09-1.34)                    | 0.2 (0.09-0.61)                                   | 0.41           |
| Interleukin-1b [Median in pg/ml (IQR)]              | 0.05 (0.03-0.07)                    | 0.06 (0.04-0.08)                                  | 0.46           |
| Interleukin-4 [Median in pg/ml (IQR)]               | 0.15 (0.1-0.3)                      | 0.15 (0.11-0.26)                                  | 0.97           |
| Interleukin-5 [Median in pg/ml (IQR)]               | 0.23 (0.12-0.41)                    | 0.163 (0.08-0.34)                                 | 0.15           |
| Interleukin-6 [Median in pg/ml (IQR)]               | 1.15 (0.69-1.9)                     | 1.82 (0.84-3.5)                                   | 0.033*         |
| Interleukin-7 [Median in pg/ml (IQR)]               | 3.89 (2.63-6.31)                    | 3.8 (1.75-6.88)                                   | 0.57           |
| Interleukin-8 [Median in pg/ml (IQR)]               | 5.55 (4.3-9.9)                      | 6.79 (4.6-11.36)                                  | 0.113          |
| Interleukin-10 [Median in pg/ml (IQR)]              | 0.85 (0.62-1.1)                     | 0.94 (0.78-1.63)                                  | 0.017*         |
| Interleukin-12 p70 [Median in pg/ml (IQR)]          | 0.22 (0.12-0.4)                     | 0.22 (0.14-0.43)                                  | 0.76           |
| Interleukin-13 [Median in pg/ml (IQR)]              | 16.1 (2.2-52.77)                    | 17.23 (1.85-40.14)                                | 0.23           |
| Interleukin-15 [Median in pg/ml (IQR)]              | 10.3 (9.3-13.17)                    | 12.1 (9.15-15.13)                                 | 0.024*         |
| Interleukin-22 [Median in pg/ml (IQR)]              | 0.84 (0.44-1.24)                    | 1.3 (0.71-2.8)                                    | 0.006*         |
| Interleukin-23 [Median in pg/ml (IQR)]              | 148.7 (17.3-729.3)                  | 137.0 (19.16-522.14)                              | 0.84           |
| Tumor Necrosis Factor alpha [Median in pg/ml (IQR)] | 3.13 (2.3-3.93)                     | 3.4 (2.28-7.63)                                   | 0.036*         |
| VEGF [Median in pg/ml (IQR)]                        | 65.5 (47.6-95.5)                    | 74.3 (52.5-109.18)                                | 0.42           |

(\*) Statistically significant

**Supplementary Table 9: Correlation between intra-abdominal visceral adipose tissue mass percentage (of total mass) and serum inflammatory cytokines in patients with active inflammatory bowel diseases**

| Cytokine                           | Spearman Correlation with IA-VAT% <sup>1</sup> | P value |
|------------------------------------|------------------------------------------------|---------|
| Interferon gamma                   | 0.02                                           | 0.89    |
| Interleukin-1 alpha                | -0.1                                           | 0.5     |
| Interleukin-1 beta                 | 0.12                                           | 0.41    |
| Interleukin-4                      | -0.91                                          | 0.57    |
| Interleukin-5                      | 0.12                                           | 0.46    |
| Interleukin-6 beta                 | 0.37                                           | 0.012*  |
| Interleukin-7                      | -0.2                                           | 0.18    |
| Interleukin-8                      | -0.07                                          | 0.65    |
| Interleukin-10                     | 0.12                                           | 0.44    |
| Interleukin-12 p70                 | 0.06                                           | 0.71    |
| Interleukin-13                     | -0.37                                          | 0.01*   |
| Interleukin-15                     | 0.03                                           | 0.87    |
| Interleukin-22                     | 0.09                                           | 0.55    |
| Interleukin-23                     | -0.25                                          | 0.1     |
| Tumor Necrosis Factor alpha        | 0.53                                           | <0.001* |
| Vascular endothelial growth factor | 0.23                                           | 0.14    |

(1) IA-VAT: Intra-abdominal Visceral Adipose Tissue

(\*) Statistically significant

**Supplementary Table 10: Differences in serum interleukin levels stratified by intra-abdominal visceral adipose tissue percentage of total body mass and steroid free remission status at week 14 (infliximab and vedolizumab) or week 16 (ustekinumab).**

| Cytokine                                            | No SFDR <sup>1</sup> at week 14/16 with high IA-VAT <sup>2,3</sup> | SFDR <sup>1</sup> at week 14/16 with high IA-VAT <sup>1, 2</sup> | No SFDR at week 14/16 with low IA-VAT <sup>1, 2</sup> | SFDR at week 14/16 with low IA-VAT <sup>1, 2</sup> | P Value |
|-----------------------------------------------------|--------------------------------------------------------------------|------------------------------------------------------------------|-------------------------------------------------------|----------------------------------------------------|---------|
| Interferon Gamma [Median in pg/ml (IQR)]            | 0.09 (0.05- 0.14)                                                  | 0.11 (0.04-0.21)                                                 | 0.12 (0.07-0.265)                                     | 0.10 (0.05-0.18)                                   | 0.99    |
| Interleukin-1a [Median in pg/ml (IQR)]              | 0.25 (0.08-0.44)                                                   | 0.14 (0.09-0.90)                                                 | 0.46 (0.22-1.60)                                      | 0.17 (0.06-0.51)                                   | 0.39    |
| Interleukin-1b [Median in pg/ml (IQR)]              | 0.06 (0.05-0.07)                                                   | 0.06 (0.03-0.11)                                                 | 0.07 (0.06-0.10)                                      | 0.04 (0.03-0.06)                                   | 0.05    |
| Interleukin-4 [Median in pg/ml (IQR)]               | 0.14 (0.09-0.23)                                                   | 0.15 (0.13-0.24)                                                 | 0.16 (0.13-0.29)                                      | 0.19 (0.05-0.39)                                   | 0.81    |
| Interleukin-5 [Median in pg/ml (IQR)]               | 0.17 (0.10-0.33)                                                   | 0.12 (0.06-0.33)                                                 | 0.26 (0.13-0.52)                                      | 0.11 (0.06-0.18)                                   | 0.16    |
| Interleukin-6 [Median in pg/ml (IQR)]               | 3.50 (1.43-8.50)                                                   | 1.83 (1.21-2.63)                                                 | 2.0 (1.22-3.33)                                       | 0.85 (0.48-1.35)                                   | 0.03*   |
| Interleukin-8 [Median in pg/ml (IQR)]               | 5.469 (4.249-7.469)                                                | 8.50 (5.783-11.972)                                              | 6.979 (4.412-35.765)                                  | 7.972 (4.278-14.568)                               | 0.59    |
| Interleukin-7 [Median in pg/ml (IQR)]               | 1.89 (1.30-6.68)                                                   | 4.0 (1.87-6.55)                                                  | 6.30 (2.44-12.84)                                     | 4.00 (2.78-6.03)                                   | 0.26    |
| Interleukin-10 [Median in pg/ml (IQR)]              | 0.95 (0.78-1.15)                                                   | 1.30 (0.85-5.99)                                                 | 1.48 (0.83-4.00)                                      | 0.83 (0.58-1.39)                                   | 0.18    |
| Interleukin-12 p70 [Median in pg/ml (IQR)]          | 0.50 (0.17-0.63)                                                   | 0.16 (0.08-0.24)                                                 | 0.392 (0.13-0.46)                                     | 0.18 (0.15-0.27)                                   | 0.17    |
| Interleukin-13 [Median in pg/ml (IQR)]              | 4.16 (1.31-34.12)                                                  | 1.56 (0.31-36.03)                                                | 17.23 (5.53-64.73)                                    | 28.14 (19.16-44.67)                                | 0.03*   |
| Interleukin-15 [Median in pg/ml (IQR)]              | 12.18 (8.80-14.81)                                                 | 11.90 (7.66-17.66)                                               | 11.18 (9.52-14.33)                                    | 12.03 (9.63-15.03)                                 | 0.98    |
| Interleukin-22 [Median in pg/ml (IQR)]              | 1.326 (0.39-2.69)                                                  | 1.33 (0.72-2.04)                                                 | 3.05 (0.70-3.93)                                      | 1.03 (0.65-1.58)                                   | 0.64    |
| Interleukin-23 [Median in pg/ml (IQR)]              | 93.31 (10.15-521.79)                                               | 16.65 (3.30-285.54)                                              | 81.41 (43.95-630.94)                                  | 304.80 (135.61-453.75)                             | 0.08    |
| Tumor Necrosis Factor alpha [Median in pg/ml (IQR)] | 7.22 (3.77-20.82)                                                  | 3.86 (2.67-14.27)                                                | 3.34 (2.29-8.67)                                      | 2.12 (1.65-3.07)                                   | <0.01*  |
| VEGF [Median in pg/ml (IQR)]                        | 80.6 (59.18-150.09)                                                | 78.51 (43.63-113.60)                                             | 61.30 (30.21-95.52)                                   | 91.11 (51.41-126.34)                               | 0.57    |

(1) Steroid free deep remission at week 14 (infliximab or vedolizumab) or week 16 (ustekinumab)

(2) High intra-abdominal visceral adipose tissue (IA-VAT) defined as visceral adipose tissue % of body mass  $\geq 1.04\%$

(\*) Statistically significant
